# Supplementary material
Source: publisher site journal article supplement (https://static.cambridge.org/content/id/urn:cambridge.org:id:article:S1352465819000110/resource/name/S1352465819000110supp001.docx)
Supplement: Supplementary file 1 [file S1352465819000110supp001.docx]

**Supplementary Figure 1** Mean fatigue severity over time and the significance level for the

interaction of treatment outcome between centers.

***

****p*<.001
